# Supplementary material for: (−)-Oleocanthal inhibits growth and metastasis by blocking activation of STAT3 in human hepatocellular carcinoma
Source: PubMed Central journal article supplement (PMC5190038; doi:10.18632/oncotarget.9782), 2016-06-02
Supplement: oncotarget-07-43475-s001.pdf [file oncotarget-07-43475-s001.pdf]

## (-)-Oleocanthal inhibits growth and metastasis by blocking activation of STAT3 in human hepatocellular carcinoma

### Supplementary Materials

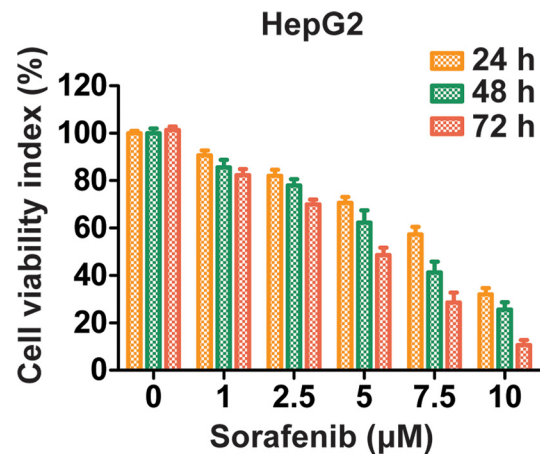

**Supplementary Figure S1: Sorafenib inhibits proliferation of HepG2 cells *in vitro*.** HepG2 cells were incubated with increasing doses of Sorafenib (0–10 μM) for 24–72 h. CCK-8 assays were then performed to determine the cell viability index. Results are shown as the means ± SD of experiments performed in triplicate.

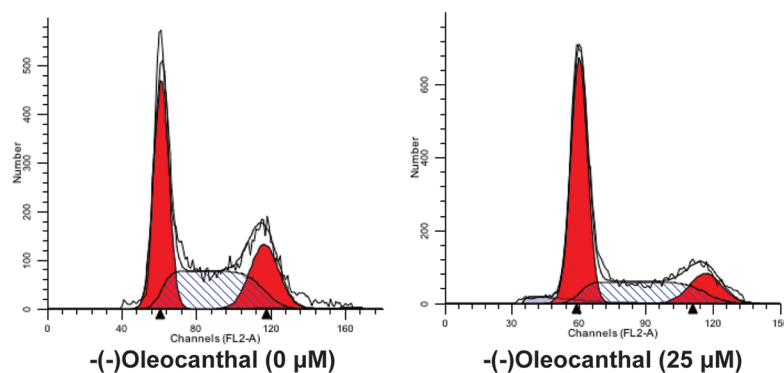

**Supplementary Figure S2: (-)-Oleocanthal inhibits cell cycle progression in HCC cells *in vitro*.** A representative image of cell cycle arrest in HepG2 cells after 48 h of treatment with 25 μM of (-)-oleocanthal is shown.

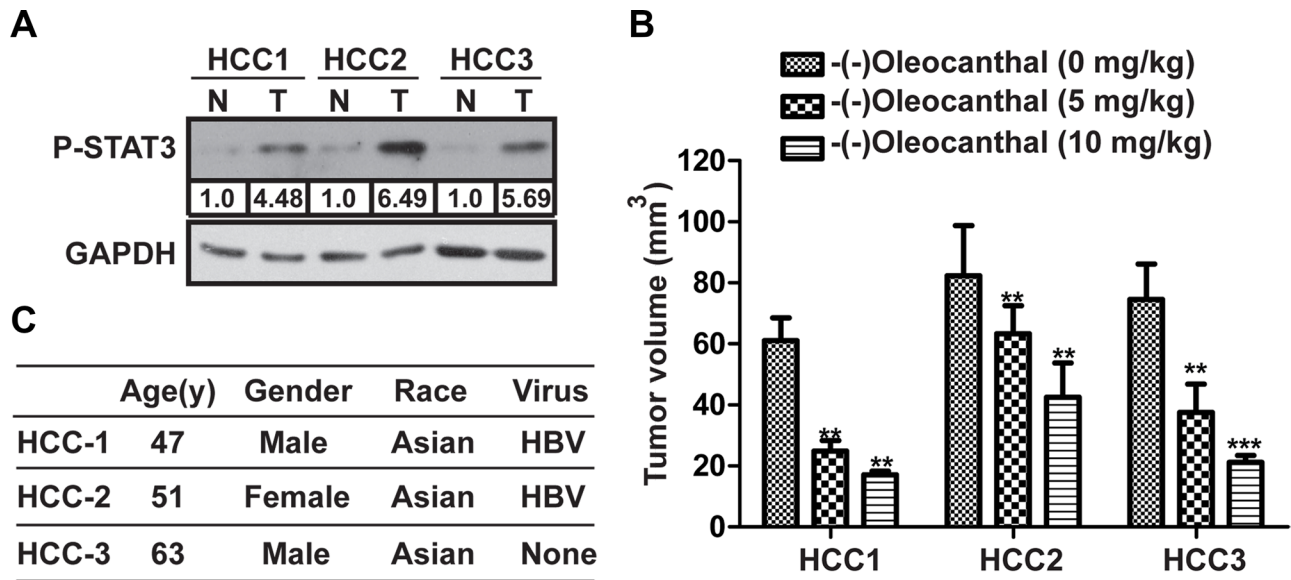

**Supplementary Figure S3: (-)-Oleocanthal inhibits growth of orthotopic HCC patient-derived xenografts.** (A) GAPDH (loading control) and p-STAT3 protein levels in tumor (T) and matched non-tumor liver (N) tissues from three HCC patients were determined using western blot. (B) Tumor volumes of HCC-1, HCC-2, and HCC-3 xenografts were measured with vernier calipers after 5 weeks of treatment with (-)-oleocanthal. (C) Characteristics of the three HCC patients from whom tissues were obtained. Data are shown as the means  $\pm$  SD of three independent experiments. \*\* $P < 0.01$  and \*\*\* $P < 0.001$  compared to controls.

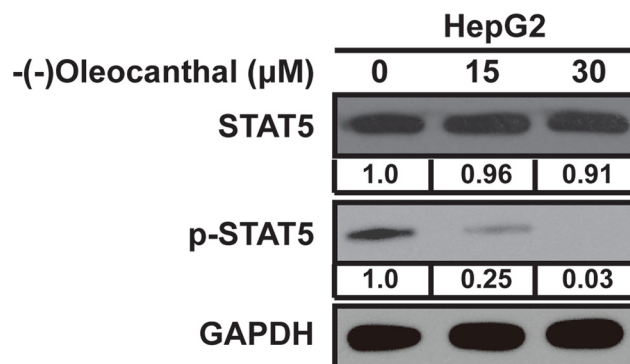

**Supplementary Figure S4: Western blot assay for STAT5 and p-STAT5 in HepG2 cells after (-)-oleocanthal treatment.** HepG2 cells were treated with 15 or 30  $\mu$ M (-)-oleocanthal for 48 h.

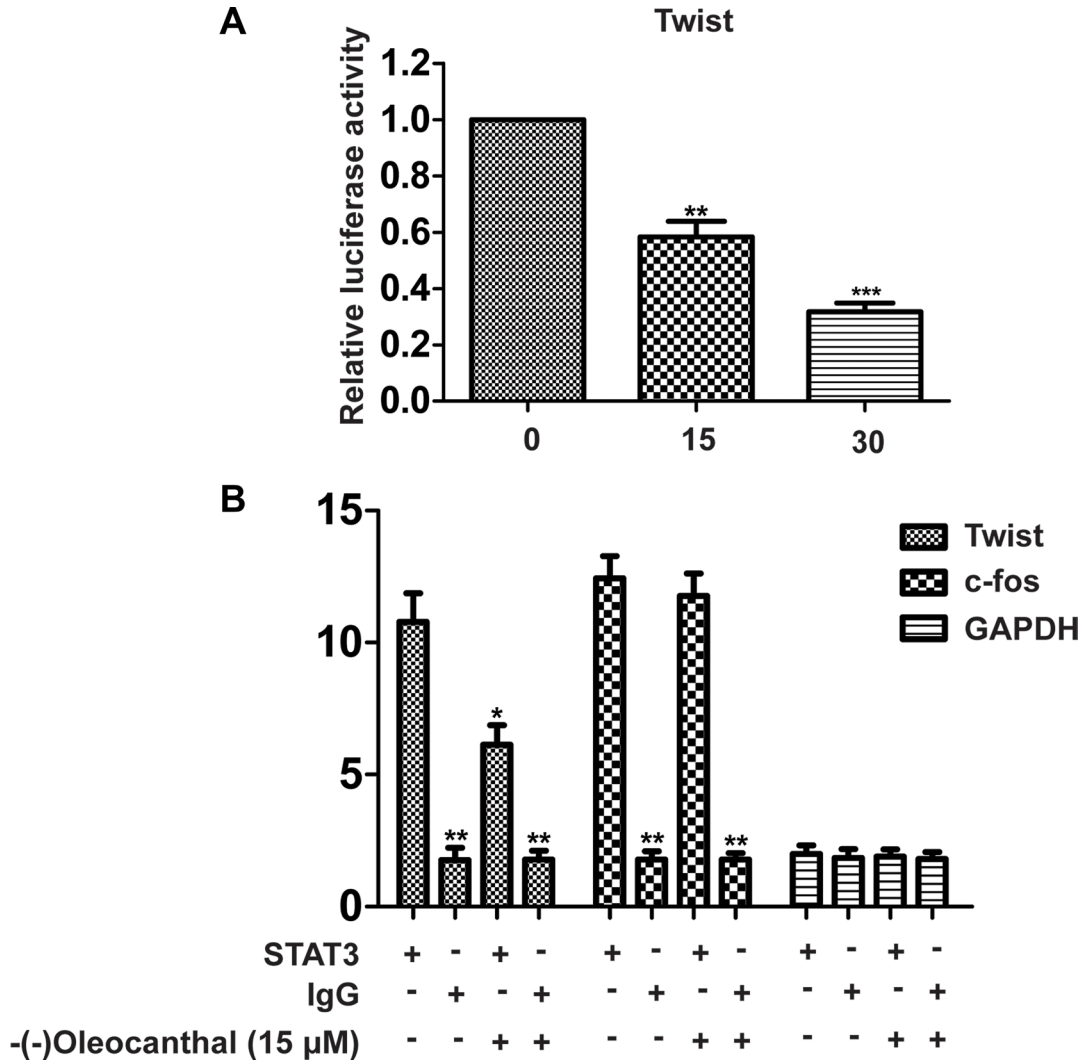

**Supplementary Figure S5: (-)-Oleocanthal inhibits the binding of STAT3 to the Twist gene promoter in HepG2 cells.**

(A) HepG2 cells were transfected with a Twist luciferase plasmid for 12 h and then exposed to various concentrations of (-)-oleocanthal for another 12 h. The transcriptional activity of Twist was measured using a luciferase gene reporter assay. Luciferase activity was normalized to renilla luciferase activity. (B) ChIP was performed to detect the interaction between STAT3 and the Twist promoter using anti-STAT3 and anti-IgG antibodies. GAPDH and the known STAT3 target c-fos are shown as negative and positive controls, respectively. Data are shown as the means  $\pm$  SD of three independent experiments. \* $P < 0.05$ , \*\* $P < 0.01$ , and \*\*\* $P < 0.001$  compared to controls.

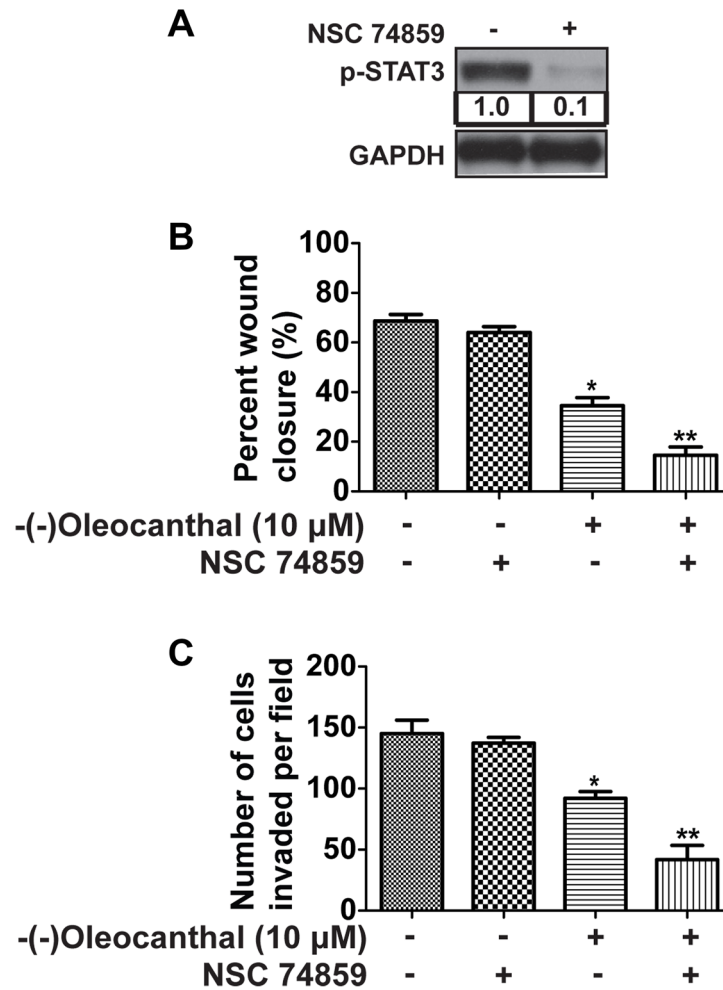

**Supplementary Figure S6: NSC 74859 enhanced the anti-migratory and anti-invasive effects of (-)-oleocanthal in HepG2 cells.** (A) Western blot assay for p-STAT3 in Huh-7 cells after NSC 74859 (50 μM) treatment. (B) Huh-7 cells were treated with (-)-oleocanthal (10 μM) or NSC 74859 (50 μM) for 48 hours; wound closure was then quantified. (C) Huh-7 cells were treated with (-)-oleocanthal (10 μM) or NSC 74859 (50 μM) for 24 hours; invaded cells were then counted in an invasion assay. Data are shown as the means ± SD of three independent experiments. \* $P < 0.05$  and \*\* $P < 0.01$  compared to controls.
